# Supplementary material
Source: PubMed Central journal article supplement (PMC6635130)
Supplement: NIHMS1011241-supplement-Supplement.pdf [file NIHMS1011241-supplement-Supplement.pdf]

Appendix 1

Global Health-  
PROMIS Global Health (10) SF

| Please respond to each item by marking one box per row |                                                                                                                                                                                                                                   | Excellent                     | Very good                     | Good                          | Fair                          | Poor                          |                               |                               |                               |                               |                               |                                |
|--------------------------------------------------------|-----------------------------------------------------------------------------------------------------------------------------------------------------------------------------------------------------------------------------------|-------------------------------|-------------------------------|-------------------------------|-------------------------------|-------------------------------|-------------------------------|-------------------------------|-------------------------------|-------------------------------|-------------------------------|--------------------------------|
| Global 01                                              | In general, would you say your health is:                                                                                                                                                                                         | <input type="checkbox"/><br>5 | <input type="checkbox"/><br>4 | <input type="checkbox"/><br>3 | <input type="checkbox"/><br>2 | <input type="checkbox"/><br>1 |                               |                               |                               |                               |                               |                                |
| Global 02                                              | In general, would you say your quality of life is:                                                                                                                                                                                | <input type="checkbox"/><br>5 | <input type="checkbox"/><br>4 | <input type="checkbox"/><br>3 | <input type="checkbox"/><br>2 | <input type="checkbox"/><br>1 |                               |                               |                               |                               |                               |                                |
| Global 03                                              | In general, how would you rate your physical health?                                                                                                                                                                              | <input type="checkbox"/><br>5 | <input type="checkbox"/><br>4 | <input type="checkbox"/><br>3 | <input type="checkbox"/><br>2 | <input type="checkbox"/><br>1 |                               |                               |                               |                               |                               |                                |
| Global 04                                              | In general, how would you rate your mental health, including your mood and your ability to think?                                                                                                                                 | <input type="checkbox"/><br>5 | <input type="checkbox"/><br>4 | <input type="checkbox"/><br>3 | <input type="checkbox"/><br>2 | <input type="checkbox"/><br>1 |                               |                               |                               |                               |                               |                                |
| Global 05                                              | In general, how would you rate your satisfaction with your social activities and relationships?                                                                                                                                   | <input type="checkbox"/><br>5 | <input type="checkbox"/><br>4 | <input type="checkbox"/><br>3 | <input type="checkbox"/><br>2 | <input type="checkbox"/><br>1 |                               |                               |                               |                               |                               |                                |
| Global 09                                              | In general, please rate how well you carry out your usual social activities and roles. (This includes activities at home, at work and in your community, and responsibilities as a parent, child, spouse, employee, friend, etc.) | <input type="checkbox"/><br>5 | <input type="checkbox"/><br>4 | <input type="checkbox"/><br>3 | <input type="checkbox"/><br>2 | <input type="checkbox"/><br>1 |                               |                               |                               |                               |                               |                                |
|                                                        |                                                                                                                                                                                                                                   | <b>Completely</b>             | <b>Mostly</b>                 | <b>Moderately</b>             | <b>A Little</b>               | <b>Not At All</b>             |                               |                               |                               |                               |                               |                                |
| Global 06                                              | To what extent are you able to carry out your everyday physical activities such as walking, climbing stairs, carrying groceries, or moving a chair?                                                                               | <input type="checkbox"/><br>5 | <input type="checkbox"/><br>4 | <input type="checkbox"/><br>3 | <input type="checkbox"/><br>2 | <input type="checkbox"/><br>1 |                               |                               |                               |                               |                               |                                |
| <b>In the past 7 days</b>                              |                                                                                                                                                                                                                                   | <b>Never</b>                  | <b>Rarely</b>                 | <b>Sometimes</b>              | <b>Often</b>                  | <b>Always</b>                 |                               |                               |                               |                               |                               |                                |
| Global 10                                              | How often have you been bothered by emotional problems such as feeling anxious, depressed or irritable?                                                                                                                           | <input type="checkbox"/><br>5 | <input type="checkbox"/><br>4 | <input type="checkbox"/><br>3 | <input type="checkbox"/><br>2 | <input type="checkbox"/><br>1 |                               |                               |                               |                               |                               |                                |
|                                                        |                                                                                                                                                                                                                                   | <b>None</b>                   | <b>Mild</b>                   | <b>Moderate</b>               | <b>Severe</b>                 | <b>Very Severe</b>            |                               |                               |                               |                               |                               |                                |
| Global 08                                              | How would you rate your fatigue on average?                                                                                                                                                                                       | <input type="checkbox"/><br>5 | <input type="checkbox"/><br>4 | <input type="checkbox"/><br>3 | <input type="checkbox"/><br>2 | <input type="checkbox"/><br>1 |                               |                               |                               |                               |                               |                                |
| Global 07                                              | How would you rate your pain on average?                                                                                                                                                                                          | <input type="checkbox"/><br>0 | <input type="checkbox"/><br>1 | <input type="checkbox"/><br>2 | <input type="checkbox"/><br>3 | <input type="checkbox"/><br>4 | <input type="checkbox"/><br>5 | <input type="checkbox"/><br>6 | <input type="checkbox"/><br>7 | <input type="checkbox"/><br>8 | <input type="checkbox"/><br>9 | <input type="checkbox"/><br>10 |
|                                                        |                                                                                                                                                                                                                                   | No Pain                       |                               |                               | Worst Imaginable Pain         |                               |                               |                               |                               |                               |                               |                                |

**Scoring:**

Re-code Global07. The recoded score ranges from 1 to 5.

(0 No pain =5; 1, 2, or 3 =4; 4, 5, or 6 =3; 7, 8, or 9 =2; 10 worst pain imaginable =1)

After recoding, the

Global Physical Health score = SUM responses to G03 + G06 + G07 + G08.

Global Mental Health score = SUM G02 + G04 + G05 + Global10.

| TOTALS                 | Raw Score | T-Score |
|------------------------|-----------|---------|
| Global Physical Health |           |         |
| Global Mental Health   |           |         |

**Appendix 2 Age Subgroup Analysis of Correlation Coefficients Between the PROMIS Global-10 and Legacy Instruments**

| Instrument                             | R-Value | P-Value | Correlation Strength |
|----------------------------------------|---------|---------|----------------------|
| <b><u>Under 40 Subgroup (n=34)</u></b> |         |         |                      |
| EQ-5D                                  | 0.80    | <0.0001 | Excellent            |
| Global 10 Physical Health              |         |         |                      |
| ASES                                   | 0.58    | <0.0001 | Good                 |
| WORC                                   | 0.31    | =0.552  | Poor                 |
| SANE                                   | 0.35    | =0.041  | Poor                 |
| Global 10 Mental Health                |         |         |                      |
| ASES                                   | 0.34    | =0.049  | Poor                 |
| WORC                                   | -0.12   | =0.822  | Poor                 |
| SANE                                   | 0.40    | =0.019  | Good                 |
| <b><u>Over 40 Subgroup (n=289)</u></b> |         |         |                      |
| EQ-5D                                  | 0.69    | <0.0001 | Excellent-Good       |
| Global 10 Physical Health              |         |         |                      |
| ASES                                   | 0.61    | <0.0001 | Excellent-Good       |
| WORC                                   | 0.48    | <0.0001 | Good                 |
| SANE                                   | 0.40    | <0.0001 | Good                 |
| Global 10 Mental Health                |         |         |                      |
| ASES                                   | 0.32    | <0.0001 | Poor                 |
| WORC                                   | 0.33    | =0.002  | Poor                 |
| SANE                                   | 0.22    | <0.0001 | Poor                 |

ASES: American Shoulder and Elbow Surgeons  
 WORC: Western Ontario Rotator Cuff Index  
 SANE: Subjective Assessment Numerical Evaluation
